# Supplementary material
Source: Springer Nature journal article supplement (https://www.springerprofessional.de/resource/supplementary/13677_2013_45_MOESM16_ESM.pdf/10743474)

**CPU**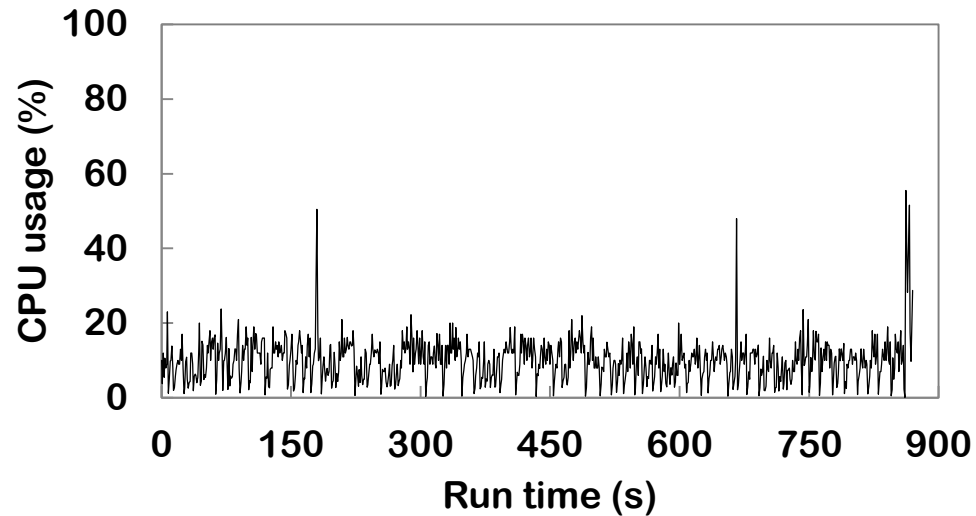**Memory**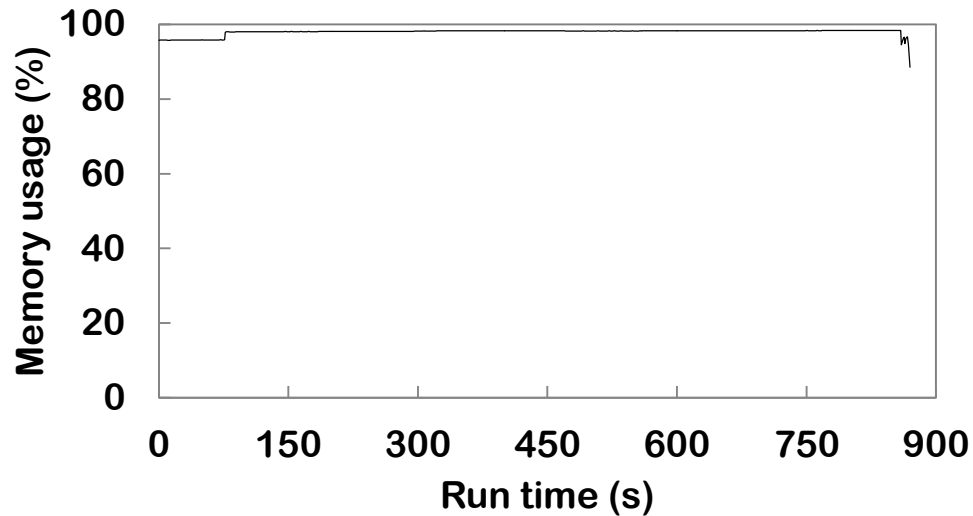**Storage**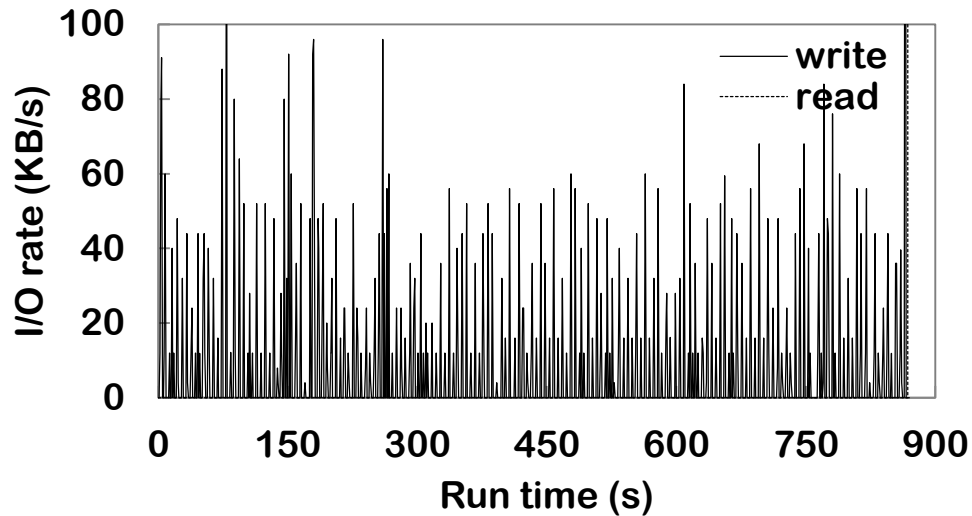

Supplement: MOESM16 [file 10743474]
